# Supplementary material for: The propagation of economic impacts through supply chains: The case of a mega-city lockdown to prevent the spread of COVID-19
Source: PubMed Central journal article supplement (PMC7491714; doi:10.1371/journal.pone.0239251), 2020-09-15
Supplement: pone.0239251.s008.pdf [file pone.0239251.s008.pdf]

**S1. Table: Results from Alternative Specifications: The loss of value added because of a Tokyo lockdown according to alternative specifications. (Unit: trillion yen)**

379  
380  
381

|                                                                             | Direct effect<br>on Tokyo | Indirect effect<br>on other regions<br>in Japan | Total effect<br>(% of GDP) | Total effect<br>difference<br>with benchmark |
|-----------------------------------------------------------------------------|---------------------------|-------------------------------------------------|----------------------------|----------------------------------------------|
| A. All production activities are shut down                                  |                           |                                                 |                            |                                              |
| 1 day                                                                       | 0.471                     | 0.349                                           | 0.820 (0.155)              | 0.259                                        |
| 1 week                                                                      | 3.30                      | 1.56                                            | 4.85 (0.916)               | 1.15                                         |
| 2 weeks                                                                     | 6.60                      | 4.79                                            | 11.4 (2.15)                | 2.13                                         |
| 1 month                                                                     | 14.1                      | 17.0                                            | 31.1 (5.89)                | 3.50                                         |
| 2 months                                                                    | 28.3                      | 43.9                                            | 72.1 (13.6)                | 4.05                                         |
| B. Producers' use is prioritised over final consumers' use                  |                           |                                                 |                            |                                              |
| 1 day                                                                       | 0.309                     | 0.252                                           | 0.561 (0.106)              | $3.32 \times 10^{-4}$                        |
| 1 week                                                                      | 2.17                      | 1.51                                            | 3.67 (0.693)               | -0.0303                                      |
| 2 weeks                                                                     | 4.33                      | 4.82                                            | 9.15 (1.73)                | -0.107                                       |
| 1 month                                                                     | 9.28                      | 17.8                                            | 27.0 (5.10)                | -0.605                                       |
| 2 months                                                                    | 18.6                      | 48.2                                            | 66.7 (12.6)                | -1.38                                        |
| C. Proportional shutdown based on the business establishments and factories |                           |                                                 |                            |                                              |
| 1 day                                                                       | 0.107                     | 0.0749                                          | 0.182 (0.0342)             | -0.380                                       |
| 1 week                                                                      | 0.747                     | 0.871                                           | 1.62 (0.305)               | -2.09                                        |
| 2 weeks                                                                     | 1.49                      | 4.19                                            | 5.68 (1.07)                | -3.58                                        |
| 1 month                                                                     | 3.20                      | 19.3                                            | 22.5 (4.25)                | -5.10                                        |
| 2 months                                                                    | 6.40                      | 56.2                                            | 62.6 (11.8)                | -5.52                                        |
